# Supplementary material for: A mesoionic nitrogen-donor ligand: structure, iridium coordination, and catalytic effects
Source: Royal Society of Chemistry journal article supplement (doi:10.1039/c7dt04555g), 2017-12-06
Supplement: c7dt04555g1.pdf [file c7dt04555g1.pdf]

*Electronic Supporting Information for*

# A Mesoionic Nitrogen-Donor Ligand: Structure, Iridium Coordination, and Catalytic Effects

Miquel Navarro,<sup>a</sup> Mo Li,<sup>b</sup> Stefan Bernhard,<sup>b</sup> Martin Albrecht<sup>\*,a</sup>

<sup>a</sup> Department of Chemistry and Biochemistry, University of Bern, Freiestrasse 3, CH–3012 Bern, Switzerland.

<sup>b</sup> Department of Chemistry, Carnegie Mellon University, 4400 Fifth Avenue, Pittsburgh, PA 15213, USA.

E-mail: martin.albrecht@dcb.unibe.ch

|                                                                 |            |
|-----------------------------------------------------------------|------------|
| <b>1. Synthetic procedures .....</b>                            | <b>S2</b>  |
| <b>2. General procedure for catalytic water oxidation .....</b> | <b>S4</b>  |
| <b>3. Crystal structure determinations .....</b>                | <b>S4</b>  |
| <b>4. NMR spectra of all new compounds .....</b>                | <b>S8</b>  |
| <b>5. IR spectra of compounds 2–4 .....</b>                     | <b>S17</b> |
| <b>6. References .....</b>                                      | <b>S18</b> |

## 1. Synthetic procedures

**General.** The metal precursor salt  $[\text{Ir}(\text{Cp}^*)\text{Cl}_2]_2$  was synthesized as reported in the literature.<sup>S1</sup> All other reagents were commercially available and used as received. Unless specified otherwise, NMR spectra were recorded at 25 °C on Bruker spectrometers operating at 300 or 400 MHz ( $^1\text{H}$  NMR), and 100 MHz ( $^{13}\text{C}$  NMR), respectively. Chemical shifts ( $\delta$  in ppm, coupling constants  $J$  in Hz) were referenced to residual solvent signals ( $^1\text{H}$ ,  $^{13}\text{C}$ ). Assignments are based on homo- and heteronuclear shift correlation spectroscopy. Purity of bulk samples of the complexes has been established by NMR spectroscopy, and by elemental analysis, which were performed at the Microanalytical Laboratory of the University of Bern using a Thermo Scientific Flash 2000 CHNS-O elemental analyser. High-resolution mass spectrometry was carried out with a Thermo Scientific LTQ Orbitrap XL (ESI-TOF).

### Compound 1

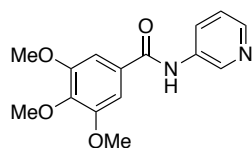

A solution of 3,4,5-trimethoxybenzoyl chloride (2.54 g, 11 mmol) in THF (10 mL) was added dropwise to a solution of 3-aminopyridine (1.19 mL, 10 mmol) and  $\text{NEt}_3$  (1.50 mL, 11 mmol) in THF (30 mL) at 66 °C. The reaction was slowly warmed to rt and stirred for 18 h. The formed precipitate was removed by filtration and washed with THF (50 mL). All filtrates were collected and volatiles were removed in vacuo to give a white solid, which was purified by column chromatography ( $\text{SiO}_2$ ;  $\text{CH}_2\text{Cl}_2/\text{MeOH}$  95:5). All solvents were removed to yield compound **1** as white solids (2.46 g, 85%).  $^1\text{H}$  NMR (400 MHz,  $d_6$ -DMSO):  $\delta$  10.32 (s, 1H, NH), 8.90 (d,  $^4J_{\text{HH}} = 2.6$  Hz, 1H,  $\text{CH}_{\text{pyr}}$ ), 8.32 (dd,  $^3J_{\text{HH}} = 4.7$ ,  $^4J_{\text{HH}} = 1.5$  Hz, 1H,  $\text{CH}_{\text{pyr}}$ ), 8.15 (ddd,  $^3J_{\text{HH}} = 8.3$ ,  $^4J_{\text{HH}} = 2.6$ , 1.5 Hz, 1H,  $\text{CH}_{\text{pyr}}$ ), 7.41 (dd,  $^3J_{\text{HH}} = 8.3$ , 4.7 Hz, 1H,  $\text{CH}_{\text{pyr}}$ ), 7.30 (s, 2H,  $\text{CH}_{\text{Ph}}$ ), 3.88 (s, 6H,  $\text{OCH}_3$ ), 3.74 (s, 3H,  $\text{OCH}_3$ ).  $^{13}\text{C}\{^1\text{H}\}$  NMR (100 MHz,  $d_6$ -DMSO):  $\delta$  166.2 (CO), 152.6 ( $\text{C}_{\text{Ph}}$ ), 144.6 ( $\text{CH}_{\text{pyr}}$ ), 142.2 ( $\text{CH}_{\text{pyr}}$ ), 140.6 ( $\text{C}_{\text{Ph}}$ ), 135.6 ( $\text{C}_{\text{pyr}}$ ), 129.4 ( $\text{C}_{\text{Ph}}$ ), 127.6 ( $\text{CH}_{\text{pyr}}$ ), 123.5 ( $\text{CH}_{\text{pyr}}$ ), 105.4 ( $\text{CH}_{\text{Ph}}$ ), 60.1 ( $\text{OCH}_3$ ), 56.1 ( $\text{OCH}_3$ ). HR-MS:  $m/z$  calculated for  $\text{C}_{15}\text{H}_{17}\text{N}_2\text{O}_4$   $[\text{M}+\text{H}]^+ = 289.1188$ ; found, 289.1185.

### Compound 2

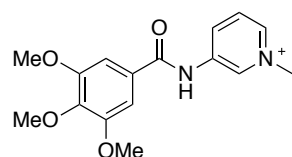

Compound **1** (576 mg, 2.00 mmol) was dissolved in MeCN (15 mL) in a pressure tube. MeI (187  $\mu\text{L}$ , 3.0 mmol) was added and the reaction was stirred for 18 h at 80 °C. The solution was cooled to rt and concentrated to 5 mL.  $\text{Et}_2\text{O}$  (50 mL) was added, which induced formation of a precipitate, which was collected by filtration to yield **2** as a yellow solid (712 mg, 83%). Crystals suitable for X-ray diffraction analysis were grown by slow diffusion of  $\text{Et}_2\text{O}$  into a MeCN solution of compound **2**.  $^1\text{H}$  NMR (300 MHz,  $d_6$ -DMSO):  $\delta$  11.02 (s, 1H, NH), 9.46 (s, 1H,  $\text{CH}_{\text{pyr}}$ ), 8.75 (d,  $^3J_{\text{HH}} = 5.9$  Hz, 1H,

CH<sub>pyr</sub>), 8.64 (d, <sup>3</sup>J<sub>HH</sub> = 8.7 Hz, 1H, CH<sub>pyr</sub>) 8.14 (dd, <sup>3</sup>J<sub>HH</sub> = 8.7, 5.9 Hz, 1H, CH<sub>pyr</sub>), 7.33 (s, 2H, CH<sub>Ph</sub>), 4.41 (s, 3H, NCH<sub>3</sub>), 3.89 (s, 6H, OCH<sub>3</sub>), 3.76 (s, 3H, OCH<sub>3</sub>). <sup>13</sup>C{<sup>1</sup>H} NMR (100 MHz, *d*<sub>6</sub>-DMSO): δ 165.6 (CO), 152.8 (C<sub>Ph</sub>), 141.3 (C<sub>Ph</sub>), 140.3 (CH<sub>pyr</sub>), 138.9 (C<sub>pyr</sub>), 136.6 (CH<sub>pyr</sub>), 134.8 (CH<sub>pyr</sub>), 128.0 (C<sub>Ph</sub>), 127.8 (CH<sub>pyr</sub>), 105.7 (CH<sub>Ph</sub>), 60.2 (OCH<sub>3</sub>), 56.2 (OCH<sub>3</sub>), 48.5 (NCH<sub>3</sub>). HR-MS: *m/z* calculated for C<sub>16</sub>H<sub>19</sub>N<sub>2</sub>O<sub>4</sub> [M-I]<sup>+</sup> = 303.1339; found, 303.1329. Elem. Anal. Calcd. for C<sub>16</sub>H<sub>19</sub>IN<sub>2</sub>O<sub>4</sub>: C, 44.67; H, 4.45; N, 6.51; Found: C 44.60; H, 4.57; N, 6.57%.

### Compound 3

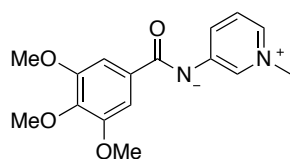

A suspension of the pyridinium salt **2** (320 mg, 1.00 mmol) in CH<sub>2</sub>Cl<sub>2</sub> (10 mL) was placed into a separation funnel. Aqueous NaOH (2 M, 15 mL) was added. After vigorous mixing, the organic phase was collected. The aqueous layer was extracted with CH<sub>2</sub>Cl<sub>2</sub> (3 x 15 mL). The combined organic layers were dried over anhydrous Na<sub>2</sub>SO<sub>4</sub> and filtered. All volatiles were removed to give compound **3** as a yellowish solid (182 mg, 60%). Crystals suitable for X-ray diffraction analysis were grown by slow diffusion of pentane into a CH<sub>2</sub>Cl<sub>2</sub> solution of compound **3**. <sup>1</sup>H NMR (300 MHz, *d*<sub>6</sub>-DMSO): δ 9.11 (s, 1H, CH<sub>pyr</sub>), 8.38 (d, <sup>3</sup>J<sub>HH</sub> = 8.7 Hz, 1H, CH<sub>pyr</sub>), 8.01 (d, <sup>3</sup>J<sub>HH</sub> = 5.8 Hz, 1H, CH<sub>pyr</sub>) 7.62 (dd, <sup>3</sup>J<sub>HH</sub> = 8.7, 5.8 Hz, 1H, CH<sub>pyr</sub>), 7.48 (s, 2H, CH<sub>Ph</sub>), 4.19 (s, 3H, NCH<sub>3</sub>), 3.80 (s, 6H, OCH<sub>3</sub>), 3.68 (s, 3H, OCH<sub>3</sub>). <sup>13</sup>C{<sup>1</sup>H} NMR (100 MHz, *d*<sub>6</sub>-DMSO): δ 169.9 (CO), 153.8 (C<sub>pyr</sub>), 151.8 (C<sub>Ph</sub>), 138.8 (CH<sub>pyr</sub>), 138.5 (C<sub>Ph</sub>), 136.9 (C<sub>Ph</sub>), 136.3 (CH<sub>pyr</sub>), 131.5 (CH<sub>pyr</sub>), 126.3 (CH<sub>pyr</sub>), 105.5 (CH<sub>Ph</sub>), 60.0 (OCH<sub>3</sub>), 55.6 (OCH<sub>3</sub>), 47.3 (NCH<sub>3</sub>). HR-MS: *m/z* calculated for C<sub>16</sub>H<sub>19</sub>N<sub>2</sub>O<sub>4</sub> [M+H]<sup>+</sup> = 303.1339; found, 303.1332. Elem. Anal. Calcd. for C<sub>16</sub>H<sub>18</sub>N<sub>2</sub>O<sub>4</sub>: C, 63.56; H, 6.00; N, 9.27; Found: C 63.57; H, 6.23; N, 9.42%.

### Compound 4

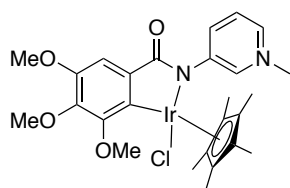

Compound **3** (120 mg, 0.40 mmol), NaOAc (33 mg, 0.40 mol) and [Ir(Cp\*)Cl<sub>2</sub>]<sub>2</sub> (120 mg, 0.15 mmol) were dissolved in CH<sub>2</sub>Cl<sub>2</sub> and stirred at rt for 18 h. All volatiles were removed under reduced pressure and the crude solid was purified by column chromatography (SiO<sub>2</sub>; CH<sub>2</sub>Cl<sub>2</sub>/MeOH 98:2) to yield complex **4** as an orange solid (153 mg, 77%). Crystals suitable for X-ray diffraction analysis were grown by slow evaporation of pentane into an acetone solution of complex **4**. <sup>1</sup>H NMR (300 MHz, CD<sub>2</sub>Cl<sub>2</sub>): δ 9.74 (s, 1H, CH<sub>pyr</sub>), 9.08 (d, <sup>3</sup>J<sub>HH</sub> = 8.7 Hz, 1H, CH<sub>pyr</sub>), 7.65 (d, <sup>3</sup>J<sub>HH</sub> = 5.7 Hz, 1H, CH<sub>pyr</sub>) 7.43 (dd, <sup>3</sup>J<sub>HH</sub> = 8.7, 5.7 Hz, 1H, CH<sub>pyr</sub>), 7.07 (s, 1H, CH<sub>Ph</sub>), 4.10 (s, 3H, NCH<sub>3</sub>), 3.91 (s, 3H, OCH<sub>3</sub>), 3.83 (s, 3H, OCH<sub>3</sub>), 3.79 (s, 3H, OCH<sub>3</sub>), 1.46 (s, 15H, Cp-CH<sub>3</sub>). <sup>13</sup>C{<sup>1</sup>H} NMR (100 MHz, *d*<sub>6</sub>-DMSO): δ 180.9 (CO), 156.6 (C<sub>Ph</sub>-Ir), 152.7 (C<sub>pyr</sub>), 150.0 (C<sub>Ph</sub>), 146.6 (C<sub>Ph</sub>), 143.1 (C<sub>Ph</sub>), 141.3 (CH<sub>pyr</sub>), 140.5 (CH<sub>pyr</sub>), 136.9 (C<sub>Ph</sub>), 132.8 (CH<sub>pyr</sub>), 126.8 (CH<sub>pyr</sub>), 108.9 (CH<sub>Ph</sub>), 87.6 (C<sub>Cp</sub>), 61.8 (OCH<sub>3</sub>), 61.0 (OCH<sub>3</sub>), 56.6 (OCH<sub>3</sub>), 48.7 (NCH<sub>3</sub>), 9.5 (Cp-CH<sub>3</sub>). HR-MS: *m/z* calculated for C<sub>26</sub>H<sub>32</sub>IrN<sub>2</sub>O<sub>4</sub> [M-Cl]<sup>+</sup> =

629.1962; found, 629.1966. Elem. Anal. Calcd. for  $C_{26}H_{32}ClIrN_2O_4$ : C, 47.02; H, 4.86; N, 4.22; Found: C 46.43; H, 4.88; N, 4.11%.

## 2. General procedure for catalytic water oxidation

**Dynamic Oxygen Evolution Measurements.** For oxygen evolution measurements, a solution of the iridium complex **4** (1 mL, concentration as specified in Table 1) was injected into a sealed 40 mL EPA vial containing 10 mL CAN solution ( $\sim 0.4$  M) buffered in 1 M  $HNO_3$ . The generated oxygen leads to an increase in gas phase pressure, which was dynamically monitored *via* differential digital manometry as described previously.<sup>S2</sup> End points of the reactions were verified by gas chromatography and corrected for nitrogen contamination.

## 3. Crystallographic details

**Crystal structure determinations.** Suitable crystals of **2**, **3** and **4** were mounted in air at ambient conditions and measured on an Oxford Diffraction SuperNova area-detector diffractometer at  $T = 173(2)$  K using mirror optics monochromated Mo  $K\alpha$  radiation ( $\lambda = 0.71073$  Å) and Al filtered.<sup>S3</sup> Data reduction was performed using the CrysAlisPro program.<sup>S4</sup> The intensities were corrected for Lorentz and polarization effects, and an absorption correction based on the multi-scan method using SCALE3 ABSPACK in CrysAlisPro was applied. The structures were solved by direct methods using SHELXT,<sup>S5</sup> and all non-hydrogen atoms were refined anisotropically. All H-atoms were placed in geometrically calculated positions and refined using a riding model with each H-atom assigned a fixed isotropic displacement parameter (1.2Ueq of its parent atom, 1.5Ueq for the methyl groups). Structures were refined on  $F^2$  using full-matrix least-squares procedures.<sup>S3</sup> The weighting schemes were based on counting statistics and included a factor to downweight the intense reflections. All calculations were performed using the SHELXL-2014 program.<sup>S5</sup>

For compound **3**, there are two solvent molecules in the unit cell/asymmetric unit. Position of water molecule was refined without doubts, but the second one was assumed a  $CH_2Cl_2$  molecule as it was used for crystallization. The molecule is highly disordered and no hydrogen atoms were assigned. Chlorine and carbon atoms were assigned according to the donor-acceptor adjacent of the molecule.

**Table S1.** Crystal data and structure refinement for compound **2**.

|                                 |                                                                                                       |
|---------------------------------|-------------------------------------------------------------------------------------------------------|
| CCDC No.                        | 1582052                                                                                               |
| Empirical formula               | C <sub>16</sub> H <sub>19</sub> IN <sub>2</sub> O <sub>4</sub> x CH <sub>3</sub> CN                   |
| Formula weight                  | 471.28                                                                                                |
| Temperature                     | 123(2) K                                                                                              |
| Wavelength                      | 0.71073 Å                                                                                             |
| Crystal system                  | Monoclinic                                                                                            |
| Space group                     | P 21/c                                                                                                |
| Unit cell dimensions            | a = 9.76540(10) Å    α = 90°<br>b = 8.66930(10) Å    β = 101.6120(10)°<br>c = 23.9759(3) Å    γ = 90° |
| Volume                          | 1988.24(4) Å <sup>3</sup>                                                                             |
| Z                               | 4                                                                                                     |
| Density (calculated)            | 14574 Mg/m <sup>3</sup>                                                                               |
| Absorption coefficient          | 1.638 mm <sup>-1</sup>                                                                                |
| F(000)                          | 944                                                                                                   |
| Crystal size                    | 0.293 x 0.261 x 0.099 mm <sup>3</sup>                                                                 |
| Theta range for data collection | 1.734 to 224°.                                                                                        |
| Index ranges                    | -12 ≤ h ≤ 12, -10 ≤ k ≤ 11, -31 ≤ l ≤ 31                                                              |
| Reflections collected           | 20170                                                                                                 |
| Independent reflections         | 4565 [R(int) = 0.0259]                                                                                |
| Completeness to theta = 25.242° | 100%                                                                                                  |
| Absorption correction           | Semi-empirical from equivalents                                                                       |
| Max. and min. transimission     | 0.76671 and 0.75905                                                                                   |
| Refinement method               | Full-matrix least-squares on F <sup>2</sup>                                                           |
| Data / restraints / parameters  | 4565 / 0 / 243                                                                                        |
| Goodness-of-fit on F2           | 1.047                                                                                                 |
| Final R indices [I > 2σ(I)]     | R1 = 0.0209, wR2 = 0.0465                                                                             |
| R indices (all data)            | R1 = 0.0242, wR2 = 0.0481                                                                             |
| Largest diff. peak and hole     | 0.476 and -0.3 e.Å <sup>-3</sup>                                                                      |

**Table S2.** Crystal data and structure refinement for compound **3**.

|                                 |                                                                                                                                                                         |
|---------------------------------|-------------------------------------------------------------------------------------------------------------------------------------------------------------------------|
| CCDC No.                        | 1582053                                                                                                                                                                 |
| Empirical formula               | $C_{16}H_{18}N_2O_4 \times H_2O \times 0.5CH_2Cl_2$                                                                                                                     |
| Formula weight                  | 367.80                                                                                                                                                                  |
| Temperature                     | 173.01(10) K                                                                                                                                                            |
| Wavelength                      | 0.71073 Å                                                                                                                                                               |
| Crystal system                  | Monoclinic                                                                                                                                                              |
| Space group                     | $P 2_1/n$                                                                                                                                                               |
| Unit cell dimensions            | $a = 11.6020(2) \text{ Å} \quad \alpha = 90^\circ$<br>$b = 13.05540(10) \text{ Å} \quad \beta = 107.969(2)^\circ$<br>$c = 12.1795(2) \text{ Å} \quad \gamma = 90^\circ$ |
| Volume                          | $107.969(2) \text{ Å}^3$                                                                                                                                                |
| Z                               | 4                                                                                                                                                                       |
| Density (calculated)            | $1754.83 \text{ Mg/m}^3$                                                                                                                                                |
| Absorption coefficient          | $0.247 \text{ mm}^{-1}$                                                                                                                                                 |
| F(000)                          | 764                                                                                                                                                                     |
| Crystal size                    | $0.3 \times 0.3 \times 0.3 \text{ mm}^3$                                                                                                                                |
| Theta range for data collection | 4.24 to $49.978^\circ$ .                                                                                                                                                |
| Index ranges                    | $-13 \leq h \leq 13, -15 \leq k \leq 15, -14 \leq l \leq 14$                                                                                                            |
| Reflections collected           | 25283                                                                                                                                                                   |
| Independent reflections         | 3089 [R(int) = 0.0304]                                                                                                                                                  |
| Refinement method               | Full-matrix least-squares on $F^2$                                                                                                                                      |
| Data / restraints / parameters  | 3089 / 0 / 276                                                                                                                                                          |
| Goodness-of-fit on F2           | 1.058                                                                                                                                                                   |
| Final R indices [I>2sigma(I)]   | R1 = 0.0336, wR2 = 0.0846                                                                                                                                               |
| R indices (all data)            | R1 = 0.0399, wR2 = 0.0910                                                                                                                                               |
| Largest diff. peak and hole     | 0.18 and $-0.18 \text{ e.Å}^{-3}$                                                                                                                                       |

**Table S3.** Crystal data and structure refinement for compound **4**.

|                                 |                                                                                                        |
|---------------------------------|--------------------------------------------------------------------------------------------------------|
| CCDC No.                        | 1582054                                                                                                |
| Empirical formula               | C <sub>26</sub> H <sub>32</sub> ClIrN <sub>2</sub> O <sub>4</sub>                                      |
| Formula weight                  | 664.18                                                                                                 |
| Temperature                     | 123(2) K                                                                                               |
| Wavelength                      | 0.71073 Å                                                                                              |
| Crystal system                  | Orthorhombic                                                                                           |
| Space group                     | P b c a                                                                                                |
| Unit cell dimensions            | a = 15.5088(3) Å $\alpha$ = 90°<br>b = 13.34471(14) Å $\beta$ = 90°<br>c = 24.9142(5) Å $\gamma$ = 90° |
| Volume                          | 5156.26(14) Å <sup>3</sup>                                                                             |
| Z                               | 8                                                                                                      |
| Density (calculated)            | 1711 Mg/m <sup>3</sup>                                                                                 |
| Absorption coefficient          | 5.316 mm <sup>-1</sup>                                                                                 |
| F(000)                          | 2624                                                                                                   |
| Crystal size                    | 0.305 x 0.044 x 0.026 mm <sup>3</sup>                                                                  |
| Theta range for data collection | 1.635 to 28.107°.                                                                                      |
| Index ranges                    | -19<= <i>h</i> <=17, -12<= <i>k</i> <=17, -29<= <i>l</i> <=32                                          |
| Reflections collected           | 28230                                                                                                  |
| Independent reflections         | 5788 [R(int) = 0.0415]                                                                                 |
| Completeness to theta = 25.242° | 100 %                                                                                                  |
| Absorption correction           | Gaussian                                                                                               |
| Max. and min. transmission      | 1 and 0.482                                                                                            |
| Refinement method               | Full-matrix least-squares on F <sup>2</sup>                                                            |
| Data / restraints / parameters  | 5778 / 0 / 316                                                                                         |
| Goodness-of-fit on F2           | 1.081                                                                                                  |
| Final R indices [I>2sigma(I)]   | R1 = 0.0306, wR2 = 0.0441                                                                              |
| R indices (all data)            | R1 = 0.063, wR2 = 0.0508                                                                               |
| Largest diff. peak and hole     | 0.83 and -0.725 e.Å <sup>-3</sup>                                                                      |

#### 4. NMR spectra of all new compounds

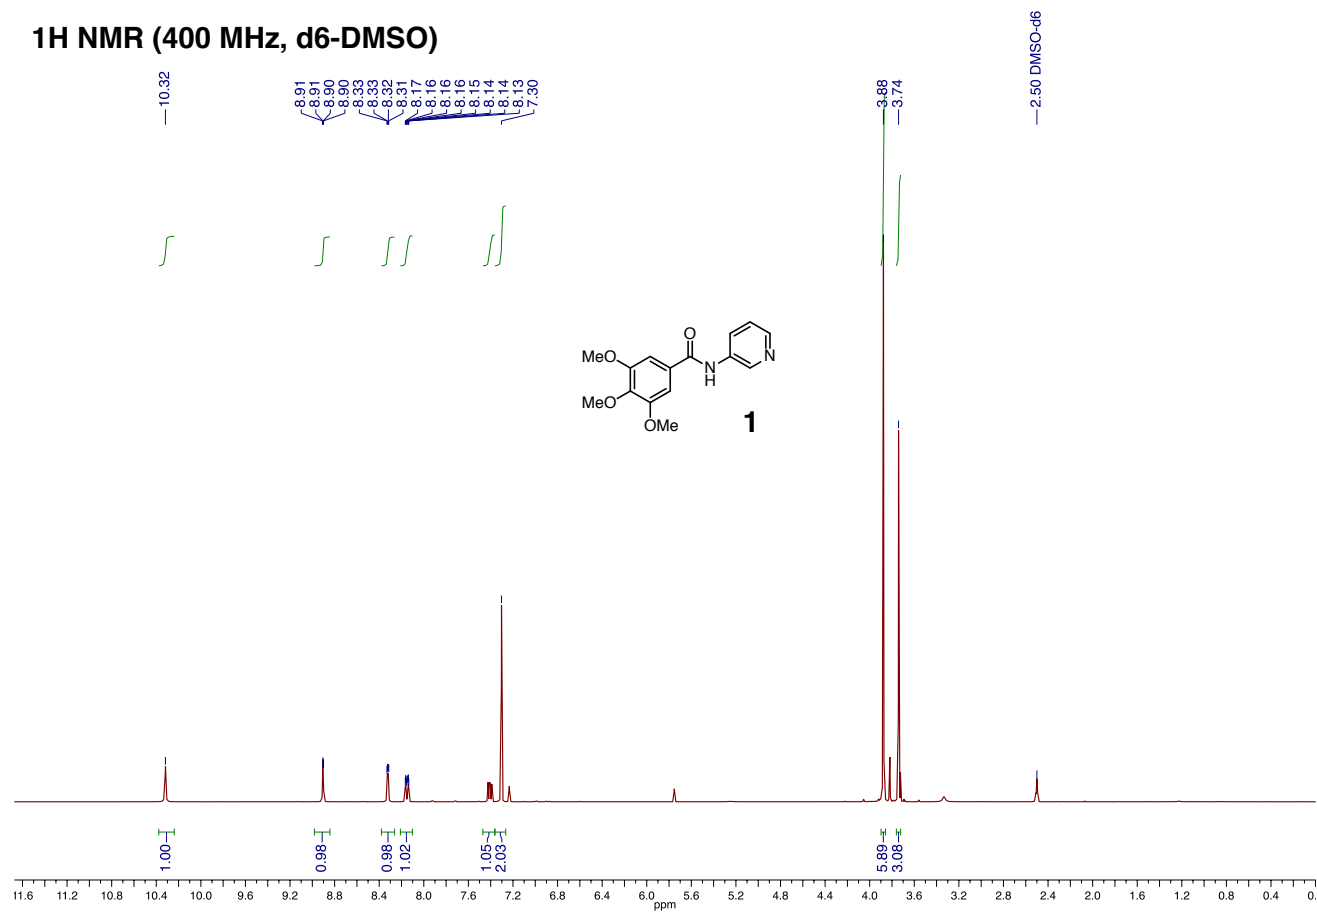

**Figure S1.** <sup>1</sup>H NMR spectrum of compound **1**.



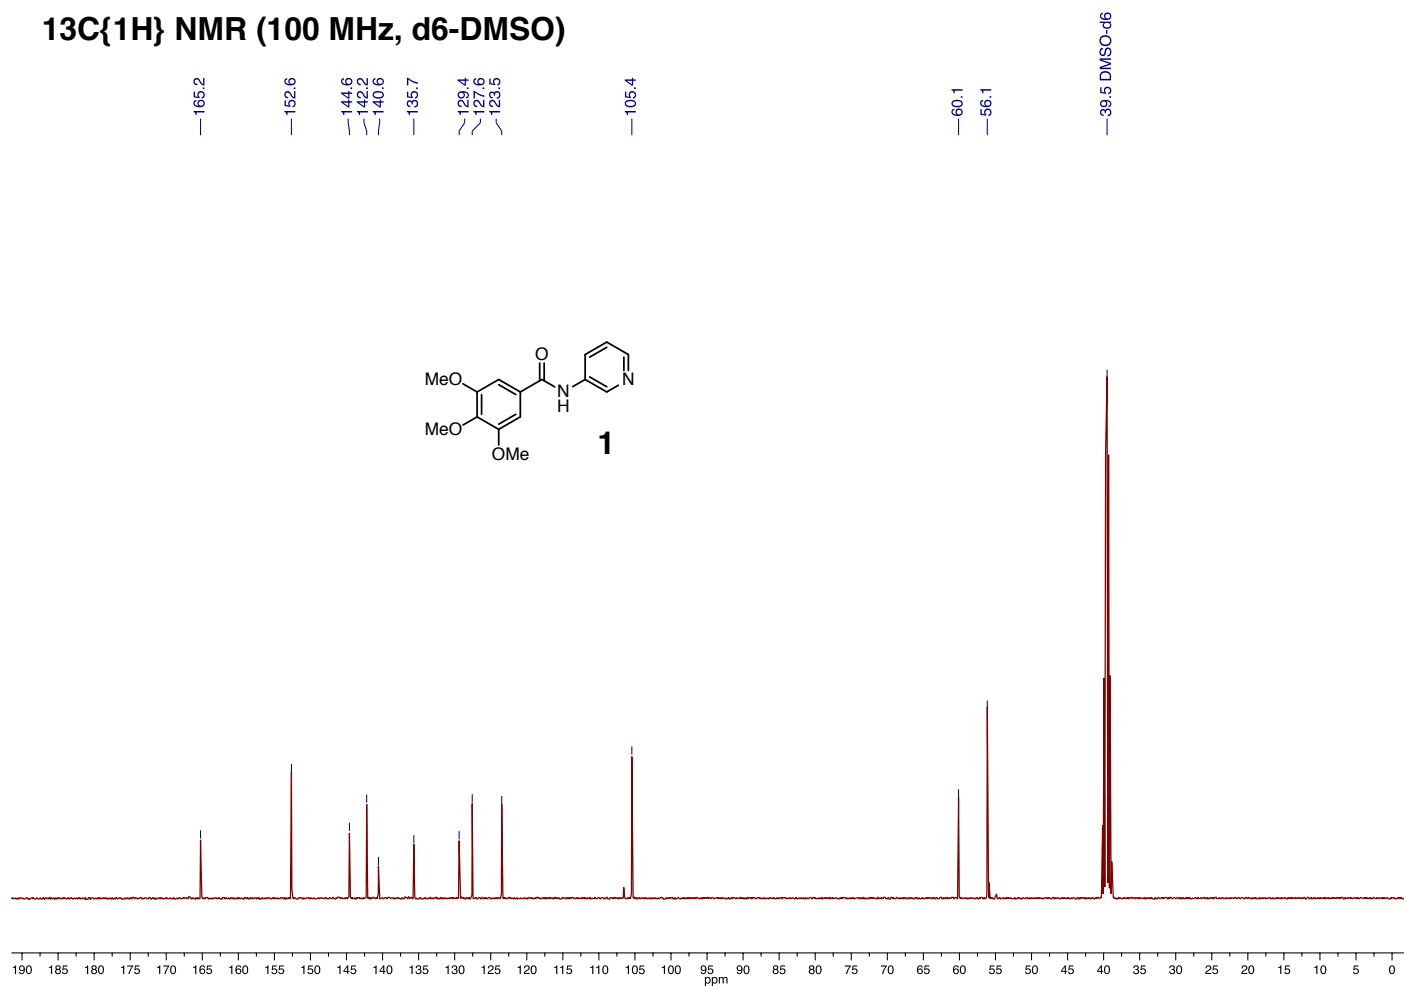

**Figure S2.**  
spectrum of compound **1**.

$^{13}\text{C}\{^1\text{H}\}$  NMR

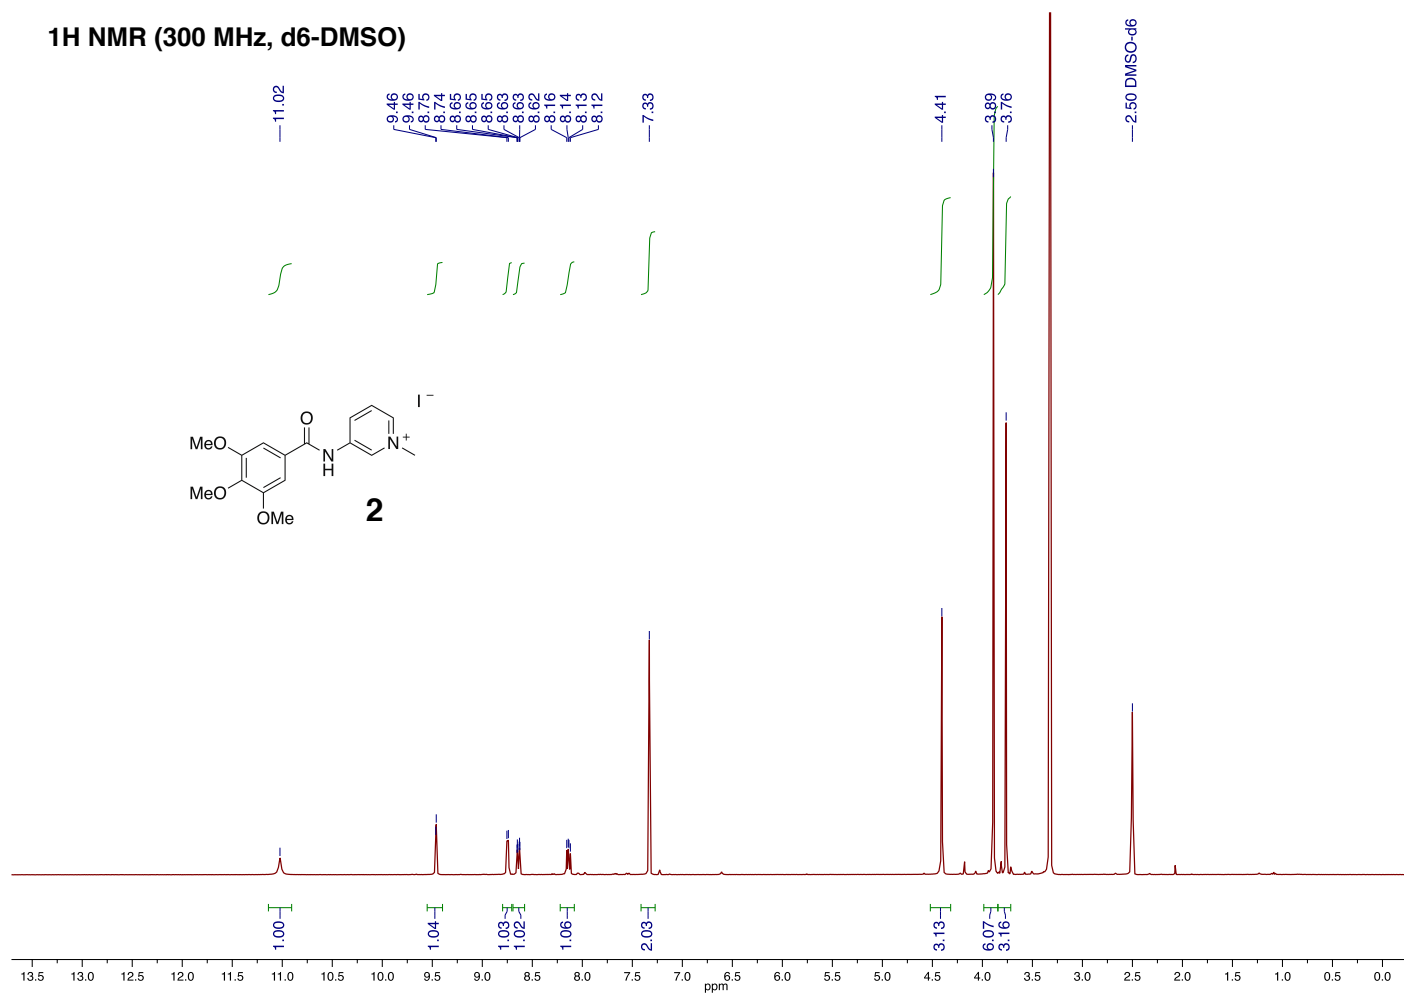

**Figure S3.** <sup>1</sup>H NMR spectrum of compound **2**.

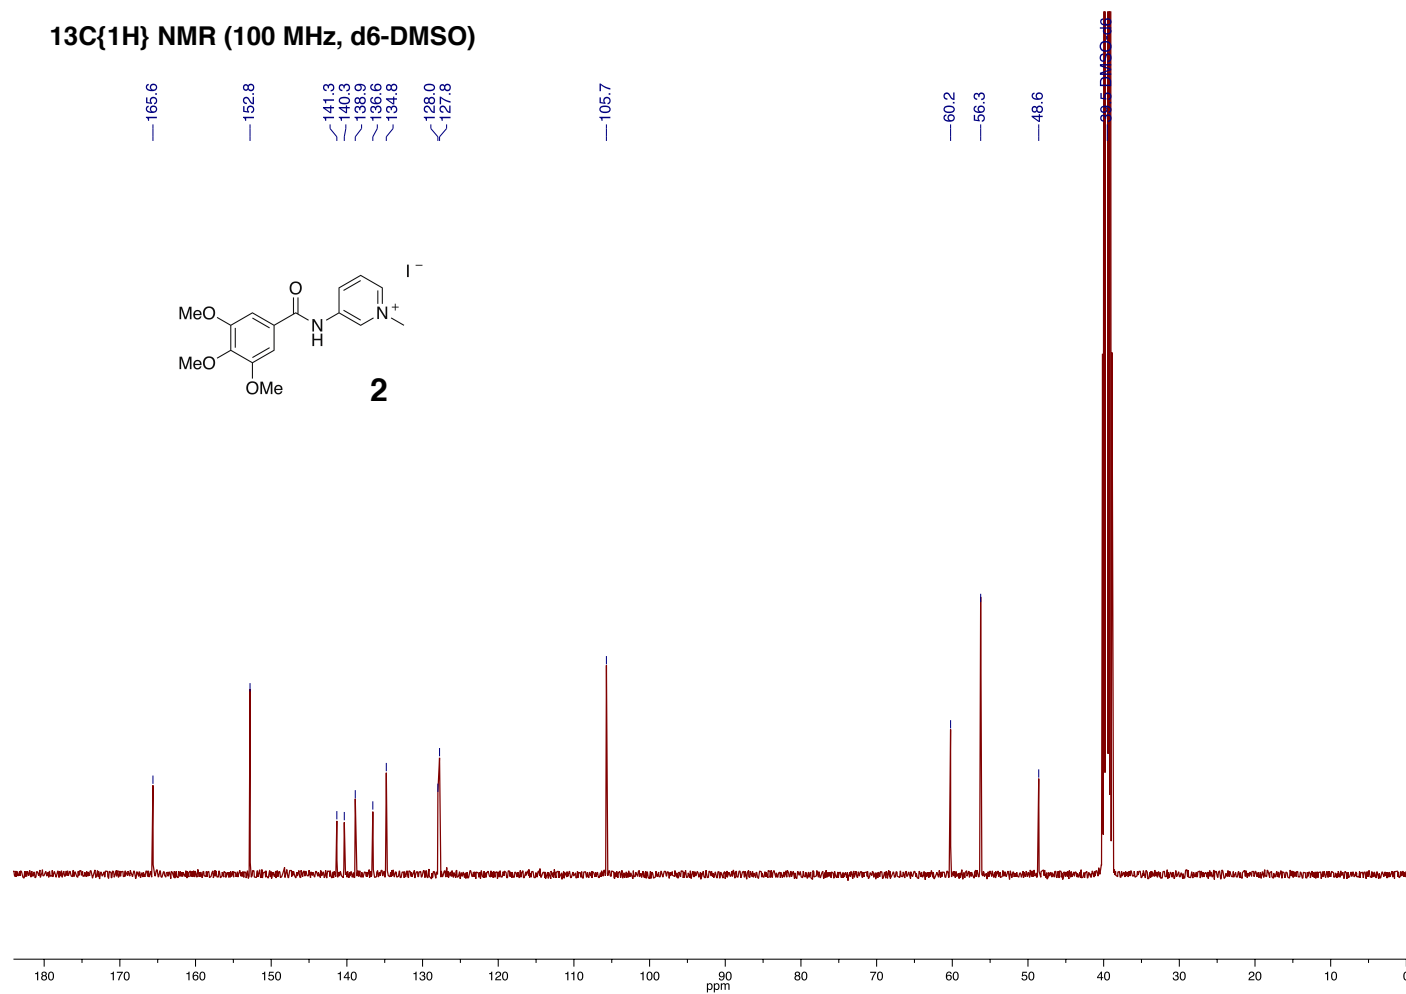

**Figure S4.**  $^{13}\text{C}\{^1\text{H}\}$  NMR spectrum of compound **2**.

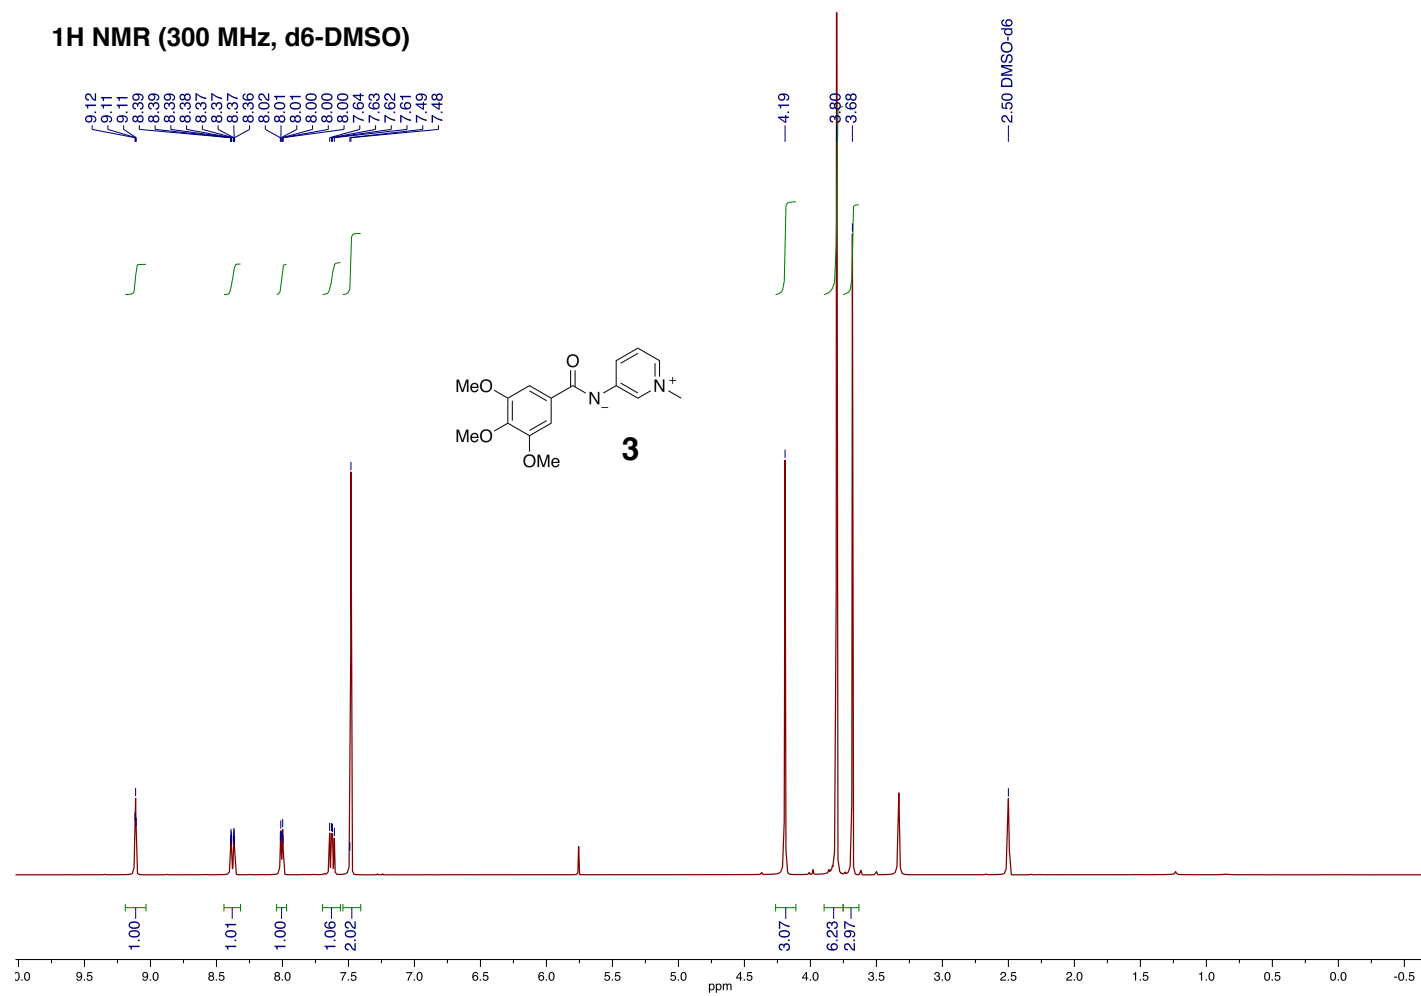

**Figure S5.** <sup>1</sup>H NMR spectrum of compound **3**.

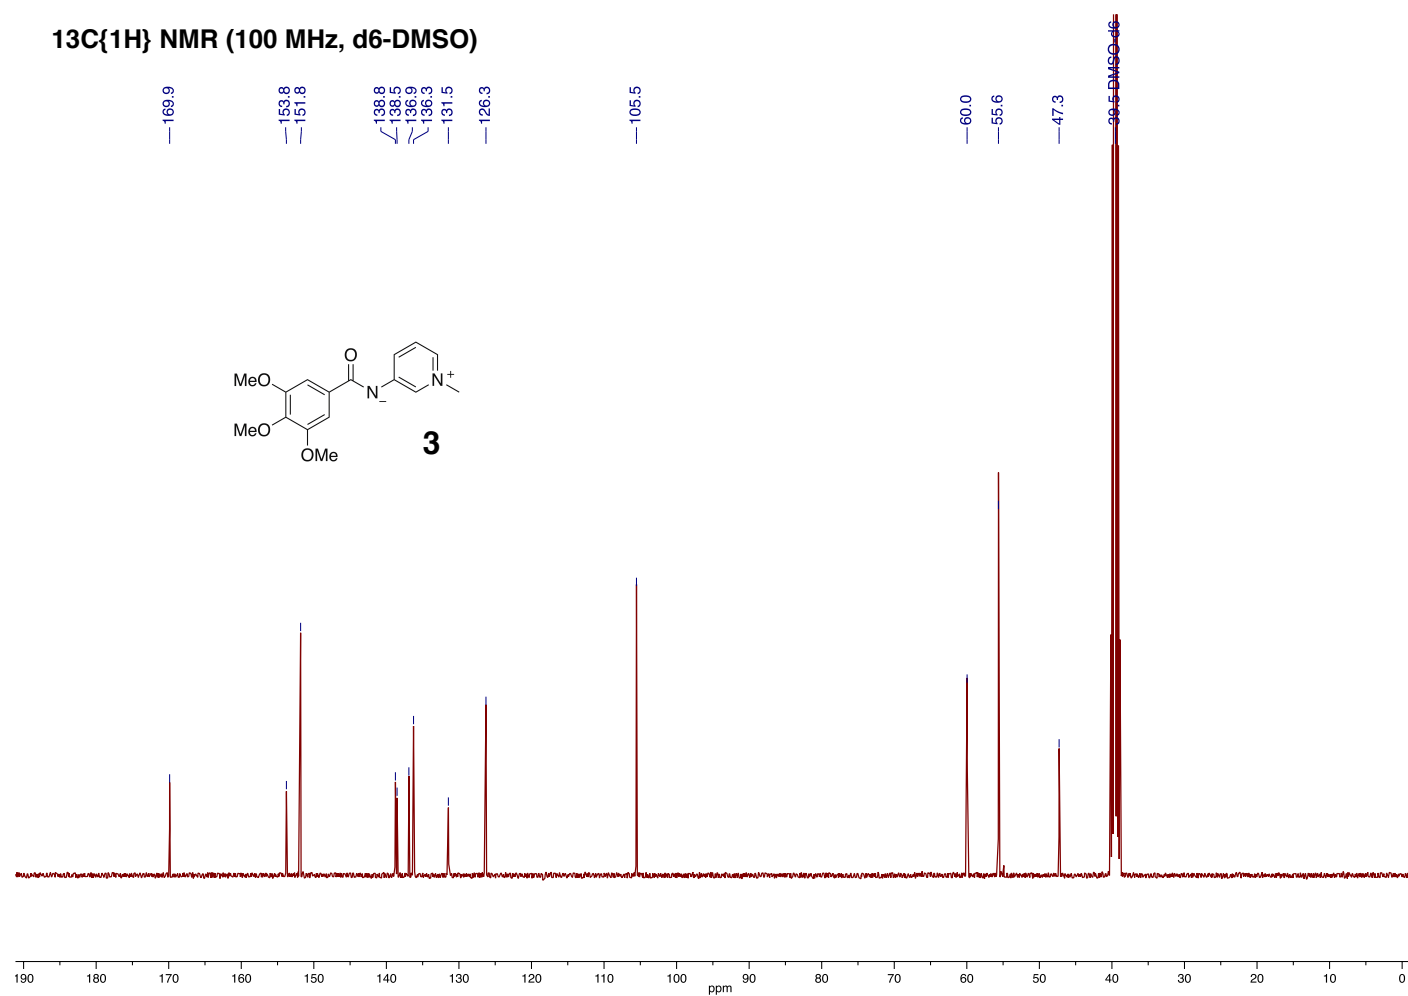

**Figure S6.**  $^{13}\text{C}\{^1\text{H}\}$  NMR spectrum of compound **3**.

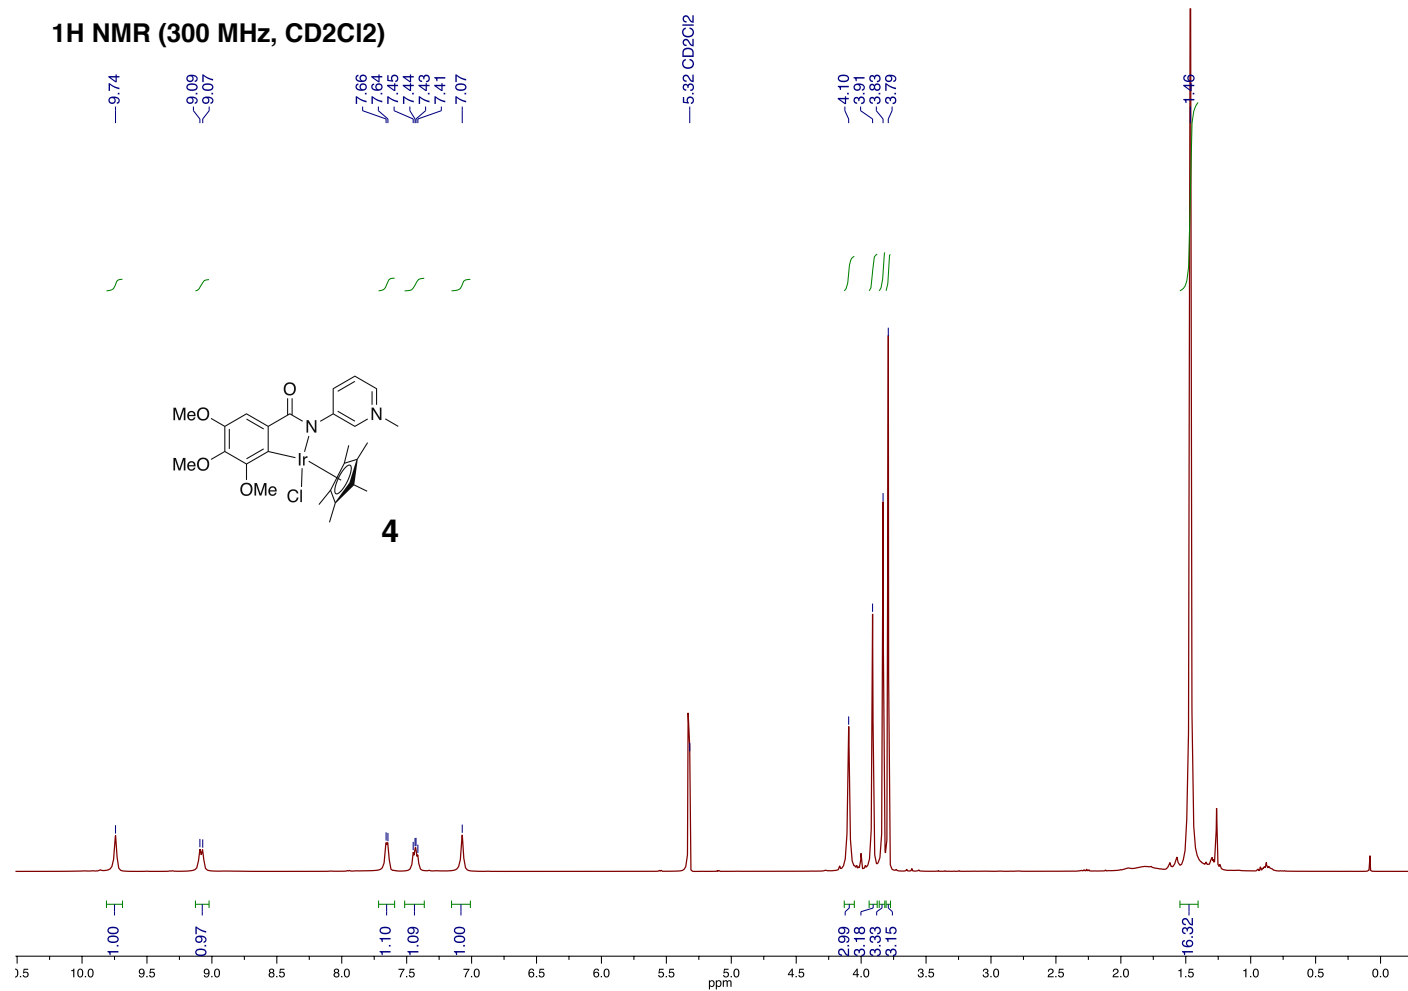

**Figure S7.** <sup>1</sup>H NMR spectrum of compound **4**.

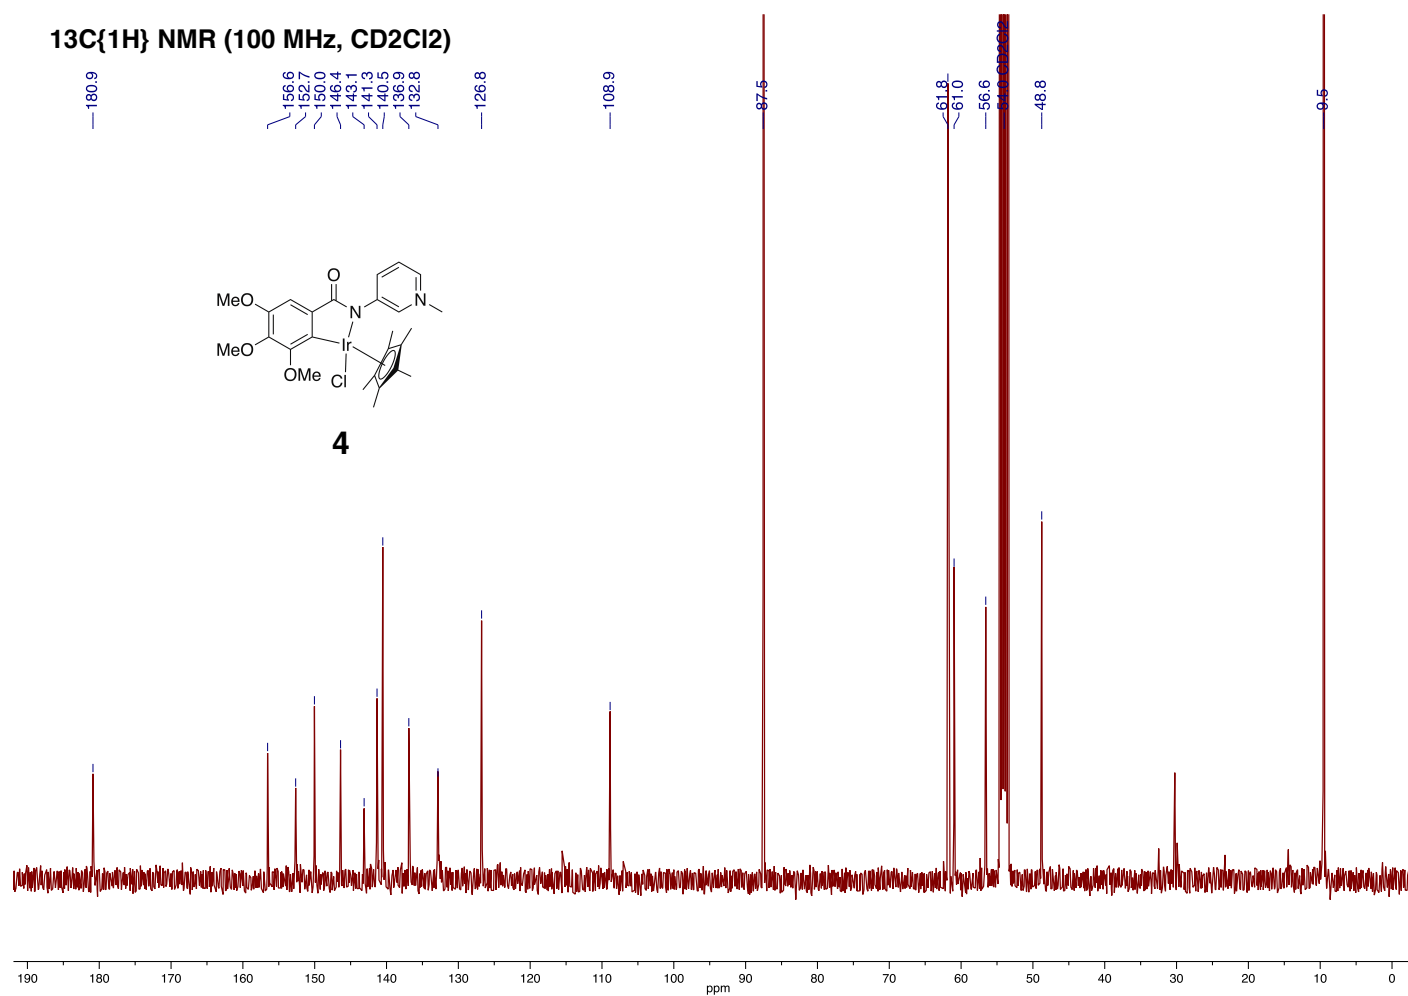

**Figure S8.**  $^{13}\text{C}\{^1\text{H}\}$  NMR spectrum of compound **4**.

## 5. IR spectra of compounds 2–4

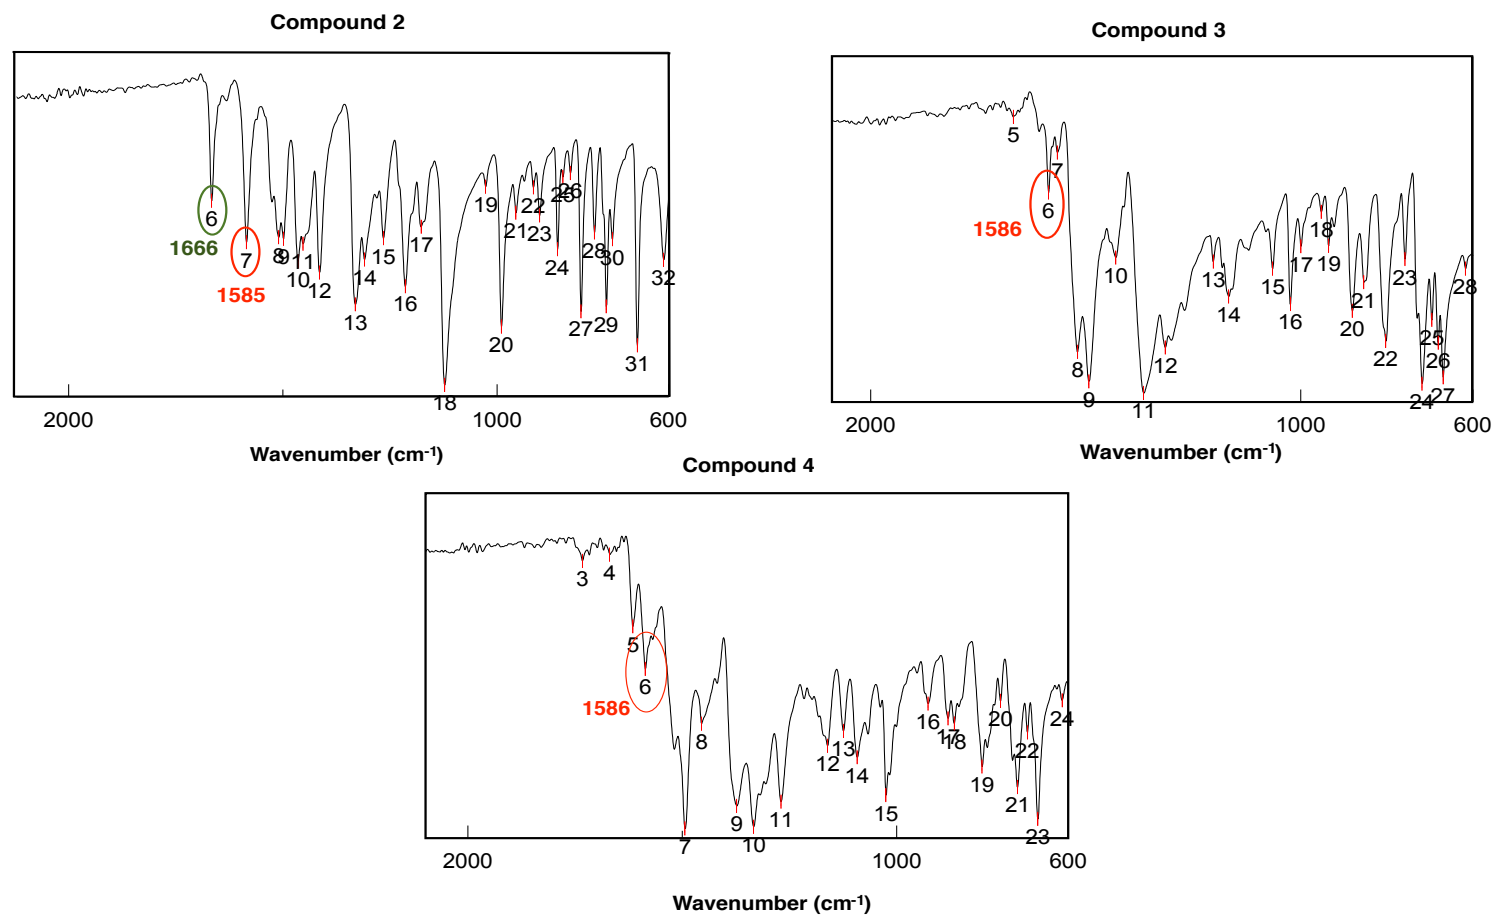

**Figure S9.** IR spectra of compounds 2–4 (assigned amide N–H bend in green, C=O stretch in red).



## 6. References

- [S1] R. G. Ball, W. A. G. Graham, D. M. Heinekey, J. J. Hoyano, A. D. McMaster, B. M. Mattson and S. T. Michel, *Inorg. Chem.* 1990, **29**, 2023.
- [S2] N. D. McDaniel, F. J. Coughlin, L. L. Tinker and S. Bernhard, *J. Am. Chem. Soc.* 2008, **130**, 210.
- [S3] P. Macchi, H. B. Bürgi, A. S. Chimpri, J. Hauser and Z. Gal, *J. Appl. Cryst.* 2011, **44**, 763.
- [S4] CrysAlisPro, version 1.171.34.44; Oxford Diffraction Ltd.: Yarnton, Oxfordshire, U.K., 2010.
- [S5] G. M. Sheldrick, *Acta Cryst. Sect. A. Found. Adv.* 2015, **71**, 3.
